# Supplementary figures and images for: Identification of Social and Occupational Risk Factors Associated with CKDu Patients in an Agricultural Community in Kebithigollewa, Sri Lanka
Source: Research Square preprint supplement (doi:10.21203/rs.3.rs-738264/v1), 2021-07-22

**Questionnaire Developed for the Survey:**


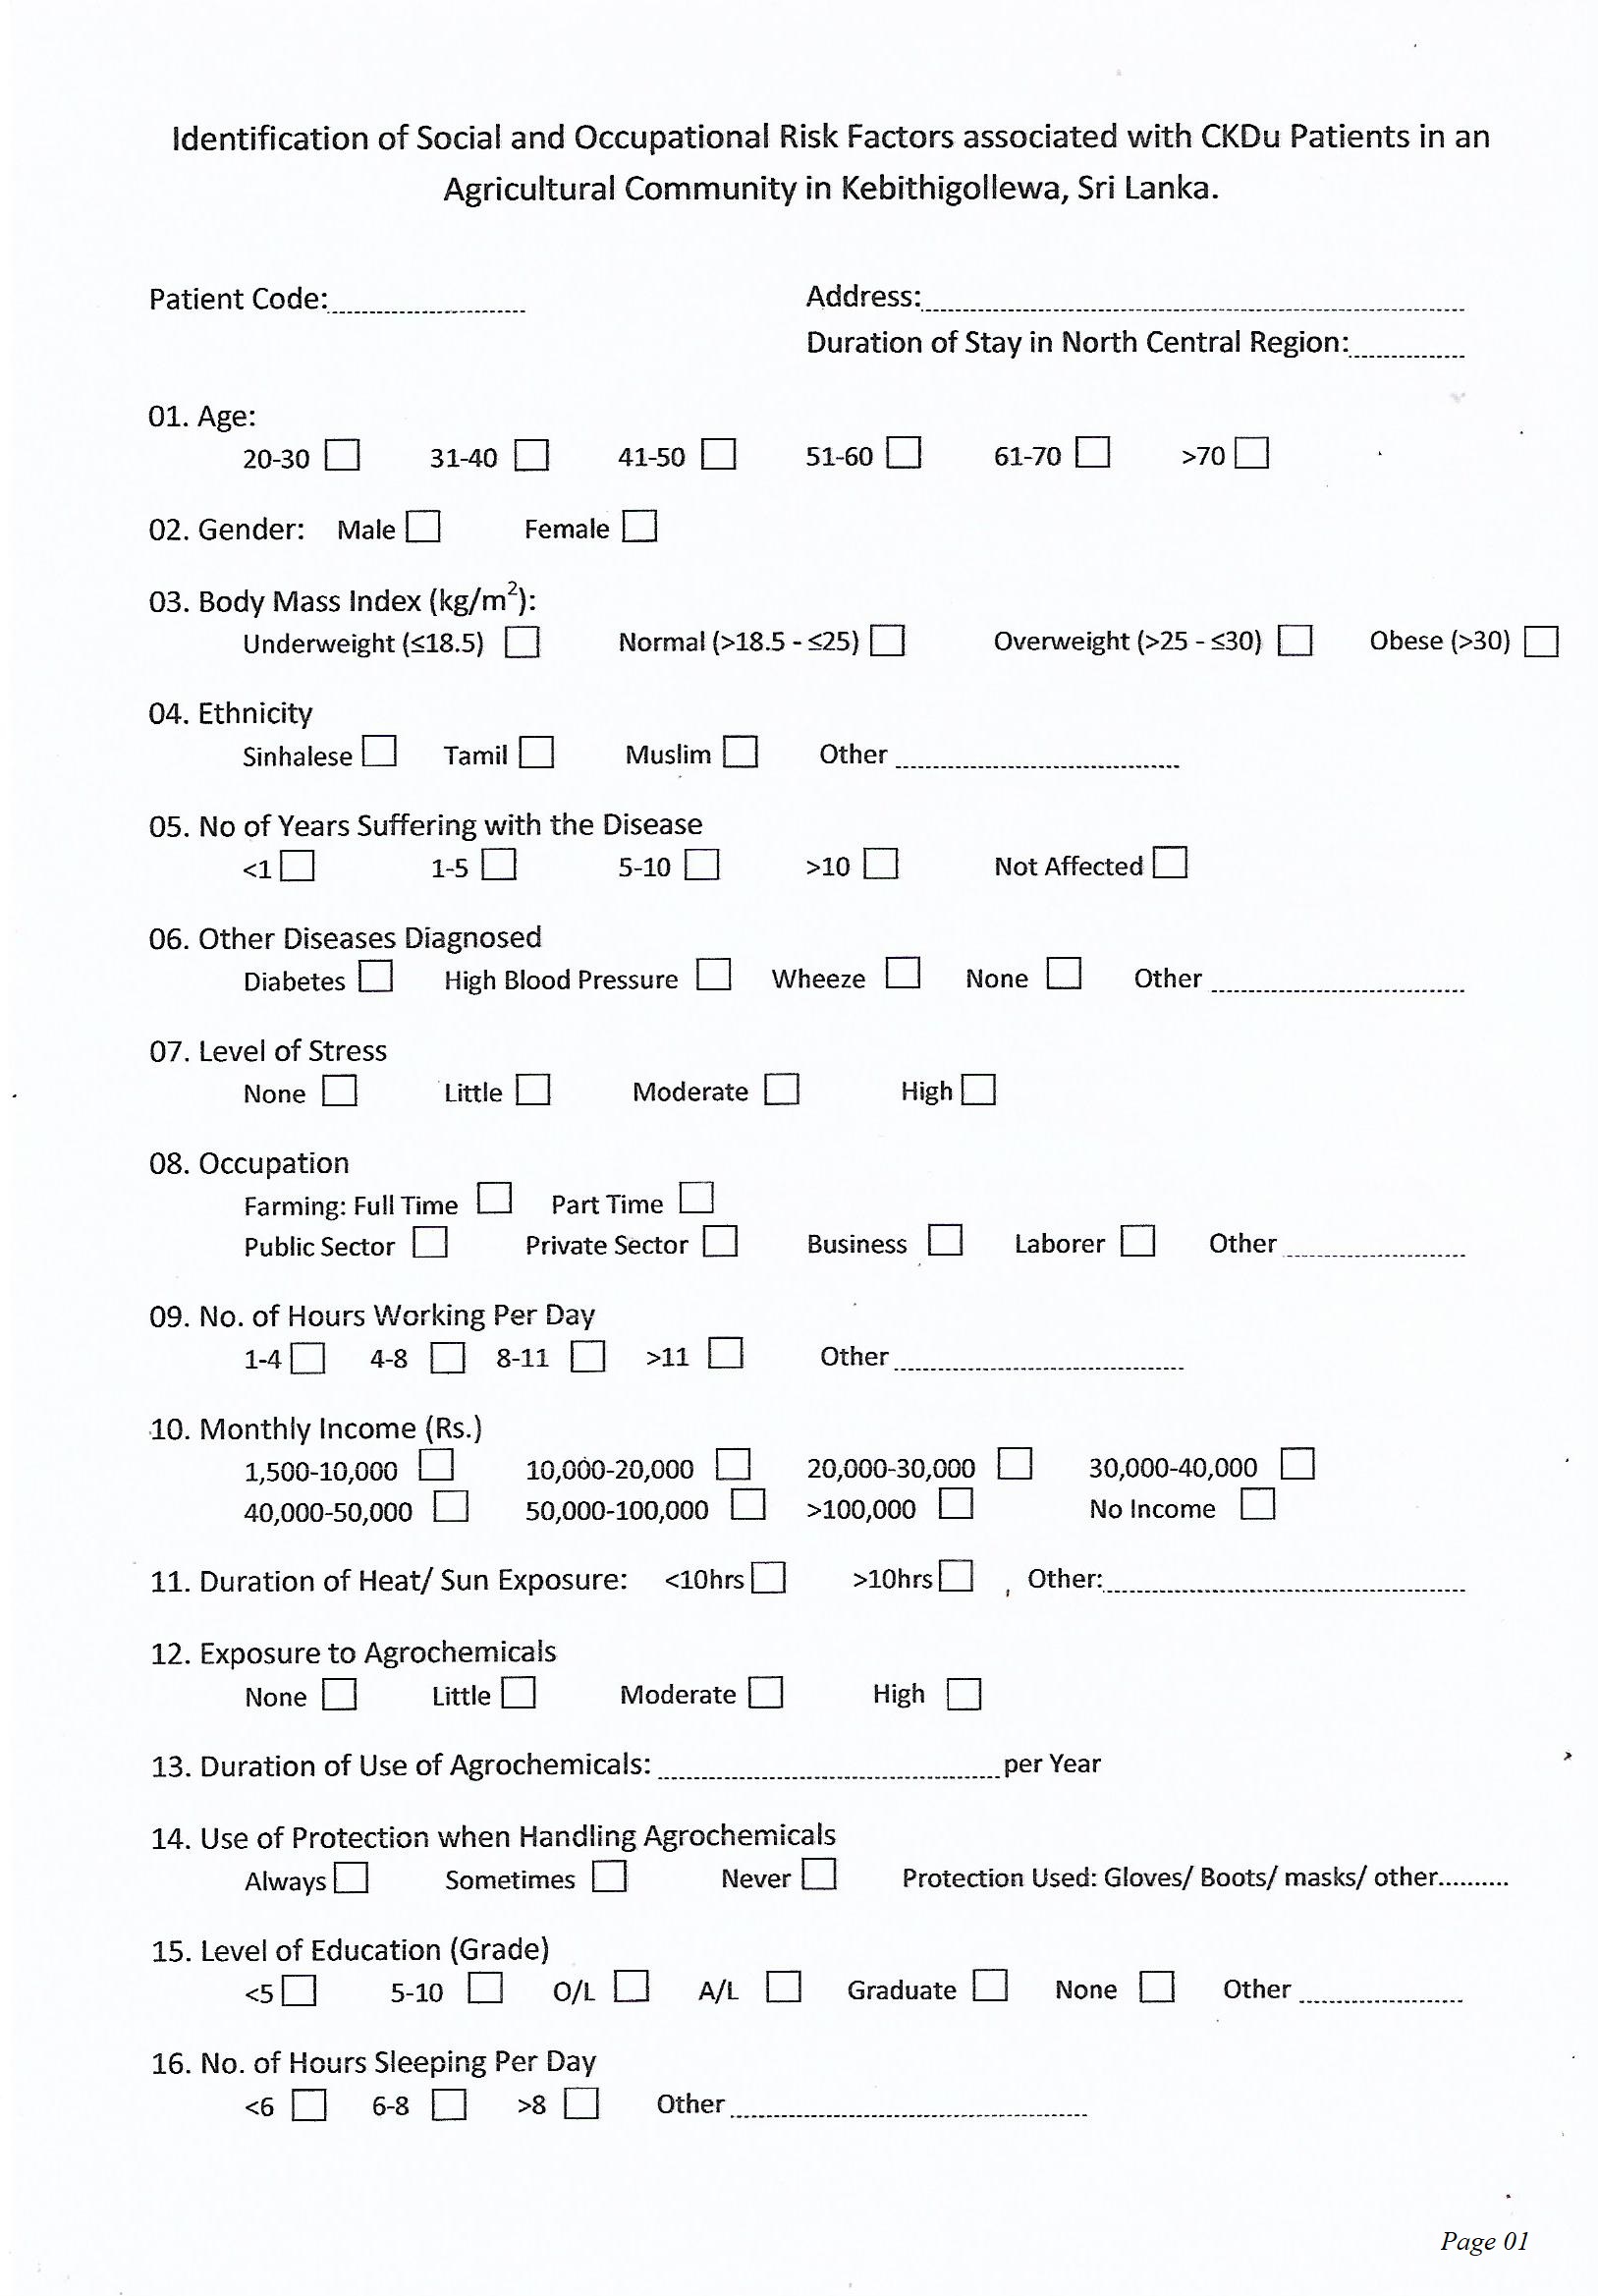


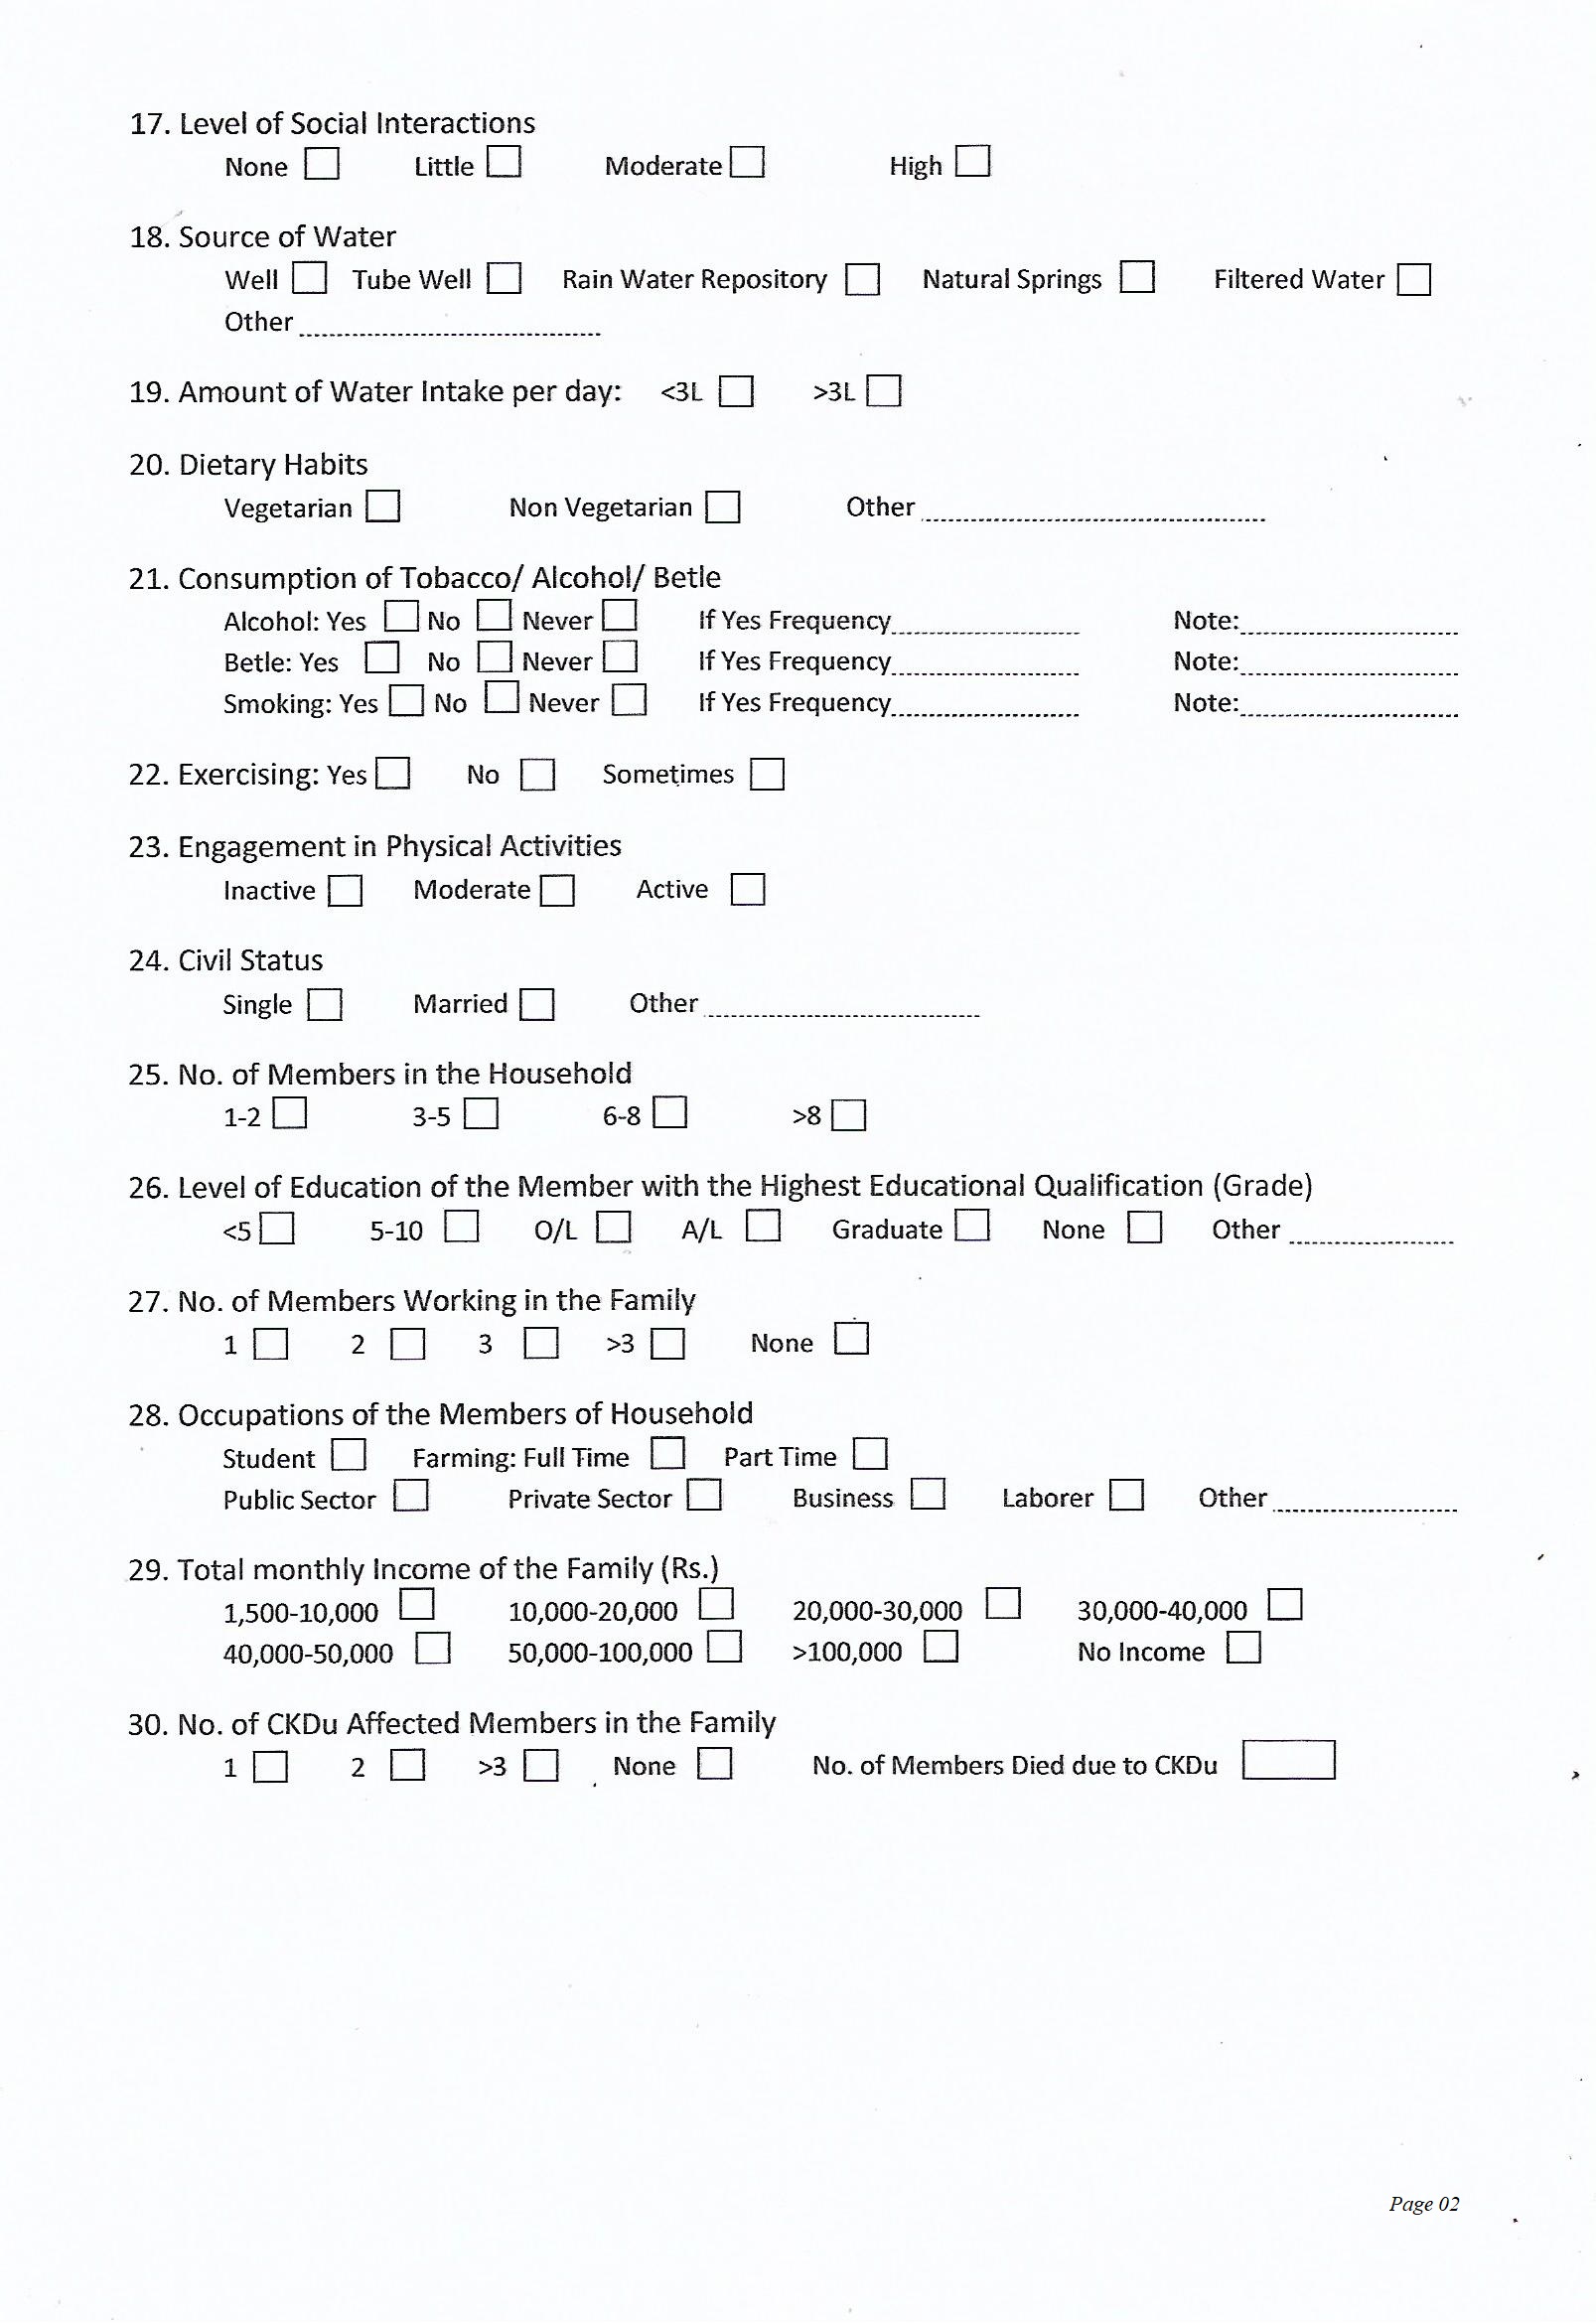


**Important Data Collected from Participants:**

**
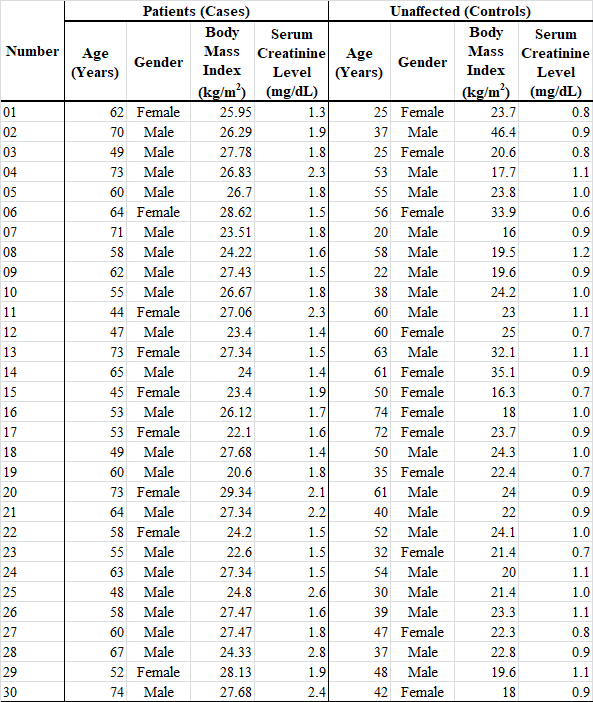
**

Supplement: Supplementary file 1 [file 05f02a52c2db704e1d44846b.docx]
